# Supplementary material for: Activation and cleavage of the N–O bond in dinuclear mixed-metal nitrosyl systems and comparative analysis of carbon monoxide, dinitrogen, and nitric oxideactivation
Source: Royal Society of Chemistry journal article supplement (doi:10.1039/b812568f), 2008-12-18
Supplement: b812568f.pdf [file b812568f.pdf]

$C_{3v}$  symmetry

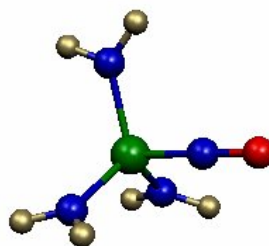

$C_s$  symmetry

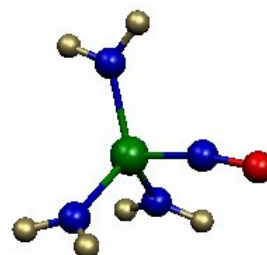

$C_s$  symmetry

one  $[NH_2]$  ligand rotated

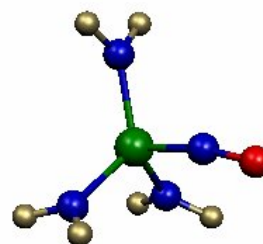

$C_s$  symmetry

two  $[NH_2]$  ligands rotated

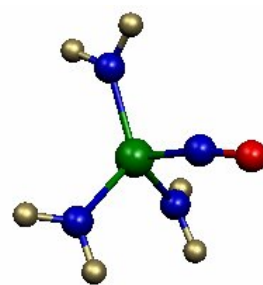

**Figure S1.** Initial structures used in geometry optimizations of encounter complexes. In addition, a  $C_1$  symmetry calculation was carried by enforcing no symmetry constraints on the (otherwise)  $C_s$  configuration.

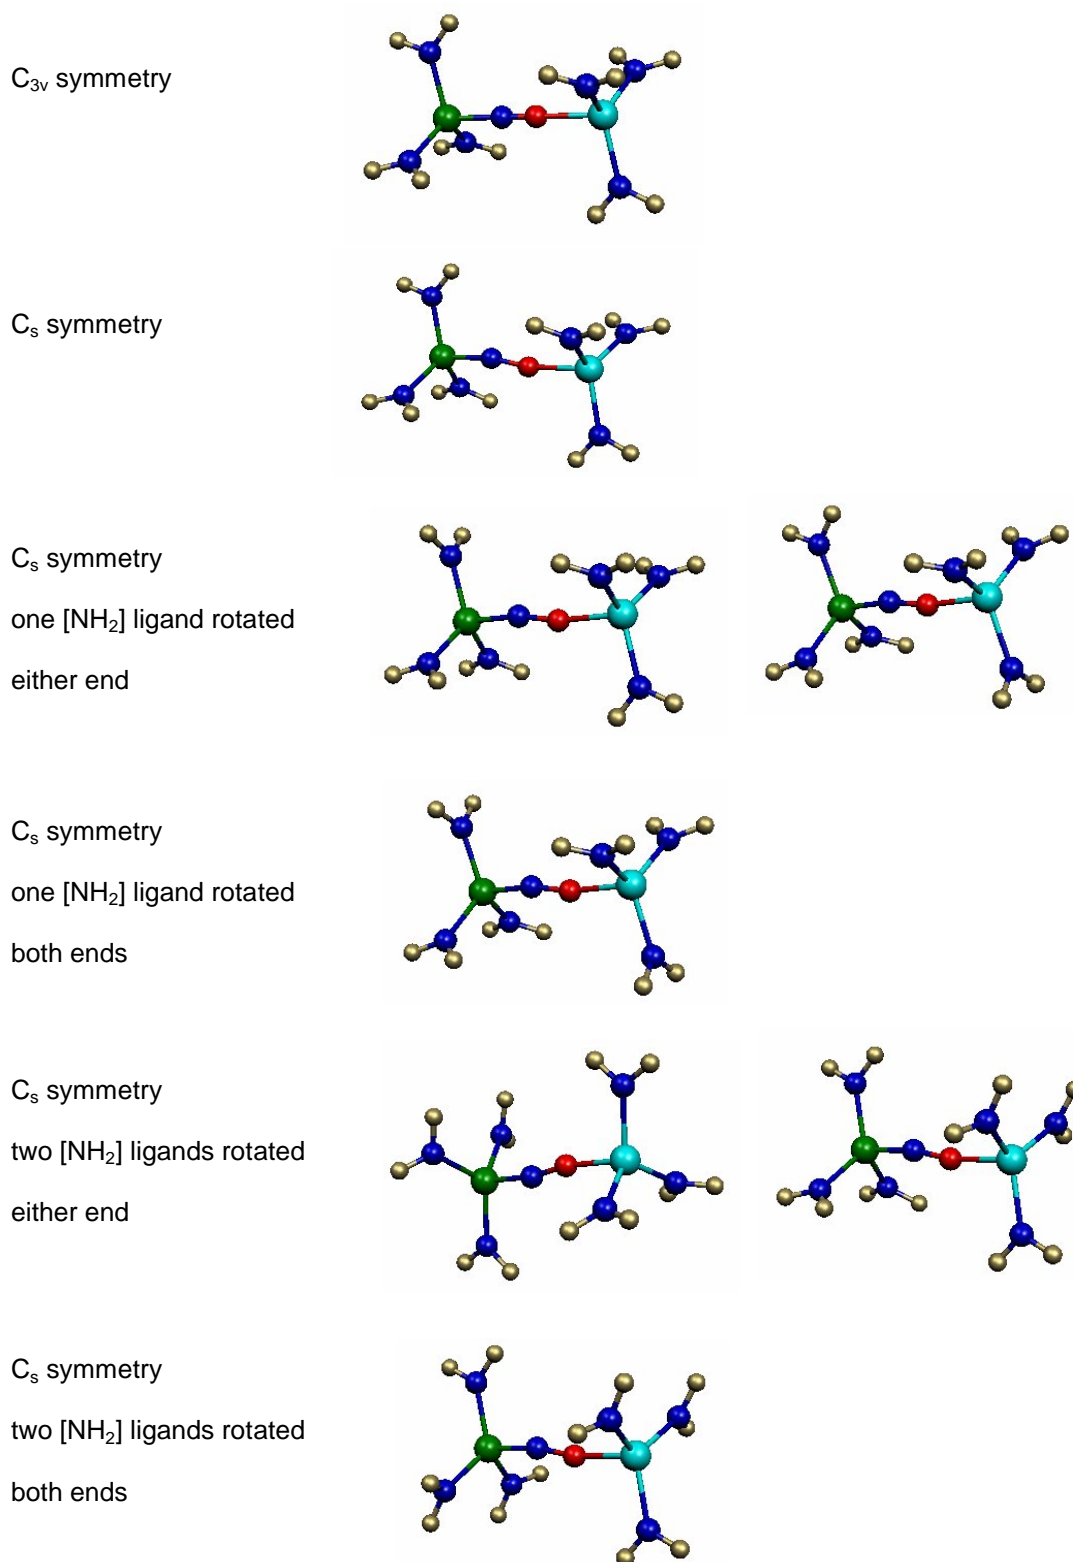

**Figure S2.** Initial structures used in geometry optimizations of dinuclear species. In addition, a  $C_1$  symmetry calculation was carried by enforcing no symmetry constraints on the (otherwise)  $C_s$  configuration.

**Table S1.** Calculated bonding energy values ( $\text{kJ}\cdot\text{mol}^{-1}$ ) for the reactants, encounter complex, dinuclear species, and products.

|                      | <b>Cr-V</b>                             | <b>Mo-Nb</b>                            | <b>W-Ta</b>      | <b>Mo-V</b>                             | <b>Mo-Mo</b>        |
|----------------------|-----------------------------------------|-----------------------------------------|------------------|-----------------------------------------|---------------------|
| Reactants            | -11749                                  | -11786                                  | -11757           | -11715                                  | -11761              |
| Encounter<br>Complex | -12012                                  | -12155                                  | -12175           | -12079                                  | -12129              |
| Dinuclear<br>Species | -12104 ( $C_1$ )<br>-12012 ( $C_{3v}$ ) | -12230 ( $C_1$ )<br>-12150 ( $C_{3v}$ ) | -12272 ( $C_s$ ) | -12142 ( $C_1$ )<br>-12079 ( $C_{3v}$ ) | -12125 ( $C_{3v}$ ) |
| Products             | -12293                                  | -12552                                  | -12661           | -12393                                  | -12401              |

**Table S2.** Calculated free energy values ( $\text{kJ}\cdot\text{mol}^{-1}$ ) for the reactants, encounter complex, dinuclear species, and products.

|                      | <b>Cr-V</b>                             | <b>Mo-Nb</b>                            | <b>W-Ta</b>      | <b>Mo-V</b>                             | <b>Mo-Mo</b>        |
|----------------------|-----------------------------------------|-----------------------------------------|------------------|-----------------------------------------|---------------------|
| Reactants            | -11584                                  | -11628                                  | -11603           | -11553                                  | -11600              |
| Encounter<br>Complex | -11780                                  | -11935                                  | -11962           | -11860                                  | -11907              |
| Dinuclear<br>Species | -11819 ( $C_1$ )<br>-11729 ( $C_{3v}$ ) | -11963 ( $C_s$ )<br>-11888 ( $C_{3v}$ ) | -12006 ( $C_s$ ) | -11864 ( $C_1$ )<br>-11803 ( $C_{3v}$ ) | -11848 ( $C_{3v}$ ) |
| Products             | -12054                                  | -12328                                  | -12435           | -12159                                  | -12177              |
